# Supplementary material for: Long non-coding RNA FAM133B-2 represses the radio-resistance of nasopharyngeal cancer cells by targeting miR-34a-5p/CDK6 axis
Source: Aging (Albany NY). 2020 Sep 5;12(17):16936–50. doi: 10.18632/aging.103600 (PMC7521541; doi:10.18632/aging.103600)
Supplement: Supplementary Figures [file aging-12-103600-s001..pdf]

# SUPPLEMENTARY FIGURES

| geneID          | geneLength | CNE-2-FPKM | CNE-2R-FPKM | log2<br>Ratio(CNE-<br>2R/CNE-2) | Up-<br>Down | P-value  | FDR      | gene name      |
|-----------------|------------|------------|-------------|---------------------------------|-------------|----------|----------|----------------|
| NONHSAG001973.2 | 402        | 0.01       | 1.77        | 7.46760555                      | Up          | 2.80E-05 | 0.00015  | lnc-WDR63-5    |
| NONHSAG011558.2 | 546.22     | 0.01       | 1.56        | 7.285402219                     | Up          | 2.11E-07 | 1.37E-06 | lnc-MSRB3-3    |
| NONHSAG030149.2 | 1154.74    | 0.01       | 1.31        | 7.033423002                     | Up          | 5.50E-15 | 5.89E-14 | lnc-CCDC150-1  |
| NONHSAG033951.2 | 592        | 0.01       | 1.27        | 6.988684687                     | Up          | 8.53E-07 | 5.22E-06 | lnc-APOBEC3G-1 |
| NONHSAG037497.2 | 510.06     | 0.01       | 1.27        | 6.988684687                     | Up          | 1.39E-05 | 7.53E-05 | lnc-DRD5-10    |
| NONHSAG004953.2 | 463        | 0.01       | 1.23        | 6.942514505                     | Up          | 0.00011  | 0.00055  | lnc-PGBD2-1    |
| NONHSAG011555.2 | 731.15     | 0.01       | 1.2         | 6.906890596                     | Up          | 2.60E-08 | 1.81E-07 | lnc-WIF1-6     |
| NONHSAG038165.2 | 457        | 0.01       | 1.19        | 6.894817763                     | Up          | 0.00011  | 0.00055  | lnc-ALB-7      |
| NONHSAG050058.2 | 902.36     | 0.01       | 0.93        | 6.539158811                     | Up          | 2.60E-08 | 1.81E-07 | lnc-ZMAT4-3    |
| NONHSAG002120.2 | 592        | 0.01       | 0.89        | 6.475733431                     | Up          | 5.64E-05 | 0.00028  | lnc-ARHGAP29-1 |
| NONHSAG005214.2 | 754.32     | 0.09       | 7.47        | 6.375039431                     | Up          | 1.19E-47 | 3.55E-46 | lnc-USP6NL-7   |
| NONHSAG037523.2 | 1408.73    | 0.01       | 0.77        | 6.266786541                     | Up          | 2.40E-11 | 2.08E-10 | lnc-CPEB2-18   |
| NONHSAG032753.2 | 1491       | 0.01       | 0.77        | 6.266786541                     | Up          | 5.94E-12 | 5.37E-11 | RUNX1-IT1      |
| NONHSAG045008.2 | 3977       | 0.01       | 0.73        | 6.189824559                     | Up          | 6.24E-28 | 1.13E-26 | lnc-GJE1-2     |
| NONHSAG036567.2 | 2883.15    | 0.02       | 1.36        | 6.087462841                     | Up          | 3.11E-34 | 6.80E-33 | LINC01322      |
| NONHSAG002184.2 | 1151       | 0.01       | 0.64        | 6                               | Up          | 1.05E-07 | 6.96E-07 | LINC01776      |
| NONHSAG035579.2 | 1174.11    | 0.03       | 1.88        | 5.969626351                     | Up          | 4.22E-20 | 5.78E-19 | LINC00973      |
| NONHSAG005153.2 | 3370.89    | 0.34       | 2.57        | 2.918161708                     | Up          | 3.69E-47 | 1.09E-45 | LINC00707      |
| NONHSAG045007.2 | 1193.31    | 0.16       | 1.2         | 2.906890596                     | Up          | 3.56E-10 | 2.85E-09 | lnc-GJE1-3     |
| NONHSAG030940.2 | 1511       | 0.06       | 0.43        | 2.841302254                     | Up          | 0.00014  | 0.00067  | lnc-PER2-4     |
| NONHSAG013224.2 | 1980       | 0.11       | 0.78        | 2.8259706                       | Up          | 1.07E-09 | 8.28E-09 | lnc-SOHLH2-1   |
| NONHSAG044013.2 | 394.82     | 0.42       | 2.95        | 2.812253721                     | Up          | 1.35E-05 | 7.28E-05 | lnc-FKBP1C-6   |
| NONHSAG045053.2 | 4994       | 0.01       | 0.07        | 2.807354922                     | Up          | 0.00011  | 0.00055  | HYMAI          |
| NONHSAG041795.2 | 581.8      | 0.3        | 1.95        | 2.700439718                     | Up          | 6.11E-05 | 0.00031  | lnc-ARHGAP26-4 |
| NONHSAG048817.2 | 1013.77    | 2.59       | 16.75       | 2.693137093                     | Up          | 6.50E-65 | 2.72E-63 | LINC00513      |
| NONHSAG013698.2 | 844        | 0.28       | 1.75        | 2.64385619                      | Up          | 9.93E-08 | 6.61E-07 | lnc-PCDH9-1    |
| NONHSAG048207.2 | 2457       | 1.14       | 7.01        | 2.62038062                      | Up          | 2.18E-87 | 1.26E-85 | lnc-FAM133B-2  |
| NONHSAG036067.2 | 908        | 0.33       | 1.98        | 2.584962501                     | Up          | 4.80E-09 | 3.53E-08 | lnc-PLXND1-3   |
| NONHSAG007698.2 | 1776.06    | 0.07       | 0.41        | 2.550197083                     | Up          | 7.08E-07 | 4.38E-06 | lnc-BTBD10-7   |
| NONHSAG006784.2 | 2026.69    | 0.41       | 2.37        | 2.531191244                     | Up          | 3.33E-24 | 5.36E-23 | SH3PXD2A-AS1   |

| gene         | lncRNA          | lncRNA          | mRNA            | CNE-2R-<br>FPKM mRN | CNE-2-<br>FPKM mRN | LOG2(CNE-<br>2R/CNE-2) |
|--------------|-----------------|-----------------|-----------------|---------------------|--------------------|------------------------|
| SPINK6       | NONHSAG041876.2 | NONHSAT104439.2 | NM_001195290    | 3.01                | 34.57              | -3.52                  |
| SPINK6       | NONHSAG041876.2 | NONHSAT104439.2 | NM_205841       | 2.56                | 23.68              | -3.21                  |
| SLPI         | NONHSAG081984.1 | NONHSAT189715.1 | NM_003064       | 282.37              | 1314.53            | -2.22                  |
| WISP2        | NONHSAG031843.2 | NONHSAT188799.1 | NM_003881       | 6.74                | 50.35              | -2.90                  |
| MXLOC_017622 | LXLOC_017622    | LTCONS_00036084 | MTCONS_00036082 | 4.11                | 18.71              | -2.19                  |
| NR4A1        | LXLOC_017622    | LTCONS_00036084 | NM_173157       | 2.24                | 20.25              | -3.18                  |
| SLC43A2      | NONHSAG020465.2 | NONHSAT175813.1 | NM_152346       | 1.06                | 4.93               | -2.22                  |
| MXLOC_015576 | NONHSAG009098.2 | NONHSAT160518.1 | MTCONS_00032302 | 2.43                | 6.63               | -1.45                  |
| RAB26        | NONHSAG071429.1 | NONHSAT172548.1 | NM_014353       | 5.96                | 20.39              | -1.77                  |
| CDYL2        | NONHSAG020081.2 | NONHSAT143903.2 | NM_152342       | 1.51                | 7.56               | -2.32                  |
| CD55         | NONHSAG004121.2 | NONHSAT150390.1 | NM_000574       | 99.11               | 320.6              | -1.69                  |
| CD55         | NONHSAG004121.2 | NONHSAT150390.1 | NM_001114752    | 3.77                | 8.18               | -1.12                  |
| C11orf86     | NONHSAG062896.1 | NONHSAT159286.1 | NM_001136485    | 16.2                | 68.43              | -2.08                  |
| CASP9        | NONHSAG057532.1 | NONHSAT151163.1 | NM_001229       | 4.54                | 15.84              | -1.80                  |
| MGST3        | NONHSAG003338.2 | NONHSAT150002.1 | NM_004528       | 16.86               | 37.43              | -1.15                  |
| KRT17        | NONHSAG073663.1 | NONHSAT176199.1 | NM_000422       | 130.53              | 368.51             | -1.50                  |
| VWA7         | NONHSAG096054.1 | NONHSAT211500.1 | NM_025258       | 1.49                | 5.38               | -1.85                  |
| NCOA3        | NONHSAG081565.1 | NONHSAT188832.1 | NM_001174088    | 1.01                | 1.9                | -0.91                  |
| NCOA3        | NONHSAG081565.1 | NONHSAT188832.1 | NM_006534       | 2.8                 | 4.79               | -0.77                  |
| ADAMTSL4     | NONHSAG002860.2 | NONHSAT149788.1 | NM_019032       | 2.48                | 11.62              | -2.23                  |
| KRT17        | NONHSAG021159.2 | NONHSAT146577.2 | NM_000422       | 130.53              | 368.51             | -1.50                  |
| PANK3        | NONHSAG042176.2 | NONHSAT104991.2 | NM_024594       | 25.96               | 64.19              | -1.31                  |
| RAB11FIP3    | NONHSAG018177.2 | NONHSAT051779.2 | NM_001142272    | 3.18                | 5.73               | -0.85                  |
| RAB11FIP3    | NONHSAG018177.2 | NONHSAT051779.2 | NM_014700       | 2                   | 4.92               | -1.30                  |
| PANK3        | NONHSAG042176.2 | NONHSAT104992.2 | NM_024594       | 25.96               | 64.19              | -1.31                  |
| MXLOC_041548 | NONHSAG024566.2 | NONHSAT180116.1 | MTCONS_00084440 | 5.03                | 13.74              | -1.45                  |
| ITGA2        | NONHSAG040369.2 | NONHSAT204144.1 | NM_002203       | 13.36               | 6.27               | 1.09                   |
| VIM          | NONHSAG005322.2 | NONHSAT155167.1 | NM_003380       | 257.69              | 58.36              | 2.14                   |
| MXLOC_091728 | LXLOC_091728    | LTCONS_00185489 | MTCONS_00185490 | 4.99                | 1.61               | 1.63                   |
| ADI1         | NONHSAG078385.1 | NONHSAT184043.1 | NM_018269       | 32.16               | 9.97               | 1.69                   |
| MXLOC_088284 | LXLOC_088284    | LTCONS_00178956 | MTCONS_00178957 | 5.06                | 2.05               | 1.30                   |
| KRT81        | NONHSAG011192.2 | NONHSAT028360.2 | NM_002281       | 14.69               | 3.08               | 2.25                   |
| ANTXR2       | NONHSAG038301.2 | NONHSAT097124.2 | NM_058172       | 2.63                | 1.07               | 1.30                   |
| ANTXR2       | NONHSAG038301.2 | NONHSAT097124.2 | NM_001145794    | 10.33               | 3.19               | 1.70                   |
| SLC4A7       | NONHSAG034638.2 | NONHSAT195513.1 | NM_001258379    | 22.32               | 5.87               | 1.93                   |
| CDK6         | NONHSAG048207.2 | NONHSAT121988.2 | NM_001145306    | 18.86               | 1.04               | 4.18                   |

| miRNA id         | TPM(CNE-2) | TPM(CNE-2R) | P-value     | FDR        | CNE-2/CNE-2R |
|------------------|------------|-------------|-------------|------------|--------------|
| hsa-miR-29c-3p   | 273.93     | 7.17        | 1.65E-07    | 8.84E-07   | 38.20502092  |
| hsa-miR-203a-3p  | 472.96     | 12.57       | 0.0506482   | 0.1119336  | 37.62609387  |
| hsa-miR-6511a-3p | 12.23      | 1.22        | 1.75E-30    | 1.67E-29   | 10.02459016  |
| hsa-miR-34a-5p   | 52.035     | 5.42        | 2.29E-16    | 1.77E-15   | 9.600553506  |
| hsa-miR-6888-3p  | 0.68       | 0.08        | 0.0085548   | 0.02227902 | 8.5          |
| hsa-miR-190a-3p  | 9.11       | 2.38        | 2.96E-23    | 2.61E-22   | 3.827731092  |
| hsa-miR-203a-5p  | 0.68       | 0.18        | 0.0085548   | 0.02230704 | 3.777777778  |
| hsa-miR-4792     | 0.96       | 0.26        | 0.00218972  | 0.00620122 | 3.692307692  |
| hsa-miR-576-3p   | 4.24       | 1.15        | 3.27E-11    | 2.20E-10   | 3.686956522  |
| hsa-miR-193b-3p  | 4552.42    | 1238.45     | 0.438656    | 0.62929681 | 3.675901328  |
| hsa-miR-3646     | 0.8        | 0.22        | 0.00540266  | 0.01445124 | 3.636363636  |
| hsa-miR-210-5p   | 13.15      | 3.66        | 6.33E-31    | 6.07E-30   | 3.592896175  |
| hsa-miR-6735-5p  | 0.92       | 0.26        | 0.00340782  | 0.00934446 | 3.538461538  |
| hsa-miR-5196-3p  | 0.92       | 0.26        | 0.00340782  | 0.00933211 | 3.538461538  |
| hsa-miR-6796-5p  | 0.44       | 0.13        | 0.0548188   | 0.11974644 | 3.384615385  |
| hsa-miR-642a-5p  | 3.88       | 1.15        | 1.49E-09    | 9.21E-09   | 3.373913043  |
| hsa-miR-346      | 37.81      | 11.23       | 6.76E-80    | 9.94E-79   | 3.366874443  |
| hsa-miR-2116-5p  | 3.04       | 0.92        | 1.53E-07    | 8.32E-07   | 3.304347826  |
| hsa-miR-6810-3p  | 1.88       | 0.57        | 4.05E-05    | 0.00016541 | 3.298245614  |
| hsa-miR-629-5p   | 118.18     | 35.99       | 7.78E-239   | 1.90E-237  | 3.283689914  |
| hsa-miR-30a-5p   | 786.29     | 74.54       | 0.438656    | 0.62973261 | 10.54856453  |
| hsa-miR-200a-3p  | 71.82      | 22.07       | 2.21E-144   | 4.24E-143  | 3.25419121   |
| hsa-miR-497-5p   | 72.74      | 22.51       | 5.40E-145   | 1.05E-143  | 3.231452688  |
| novel_mir503     | 1.68       | 0.53        | 0.000144786 | 0.00052657 | 3.169811321  |
| hsa-miR-3065-5p  | 50.6       | 16.25       | 5.92E-97    | 9.30E-96   | 3.113846154  |
| hsa-miR-7641     | 0.28       | 0.09        | 0.1478852   | 0.28048126 | 3.111111111  |
| hsa-miR-1225-5p  | 0.28       | 0.09        | 0.1478852   | 0.28022488 | 3.111111111  |
| hsa-miR-5004-3p  | 0.4        | 0.13        | 0.0854916   | 0.17793583 | 3.076923077  |
| hsa-miR-6813-5p  | 0.4        | 0.13        | 0.0854916   | 0.17775736 | 3.076923077  |
| hsa-miR-4284     | 0.4        | 0.13        | 0.0854916   | 0.17757925 | 3.076923077  |
| hsa-miR-1228-3p  | 2.96       | 0.97        | 7.41E-07    | 3.78E-06   | 3.051546392  |
| hsa-miR-99a-5p   | 6983.19    | 2306.09     | 0           | 0          | 3.028151547  |
| hsa-miR-99a-3p   | 11.07      | 3.66        | 9.15E-22    | 7.93E-21   | 3.024590164  |
| hsa-miR-708-5p   | 0.12       | 0.04        | 0.438656    | 0.63148187 | 3            |
| hsa-miR-5583-3p  | 0.12       | 0.04        | 0.438656    | 0.63104364 | 3            |

**Supplementary Figure 1. The RNA-seq data of Inc-FAM133B-2, miR-34a-5p and CDK6**

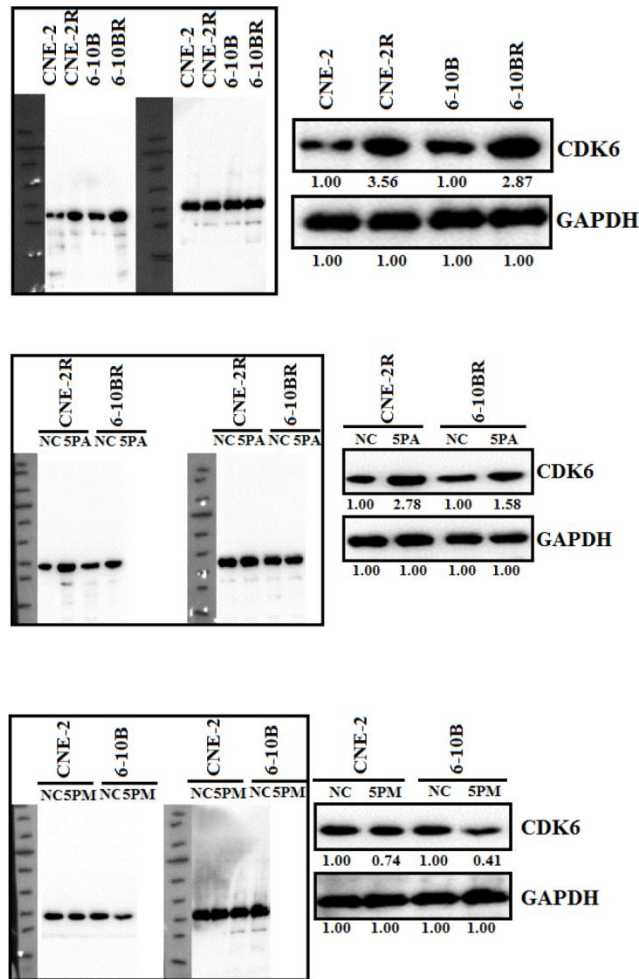

**Supplementary Figure 2. The full-length gels of the Figure 4C western analyses used in the revised manuscript.** The full-length gels of the Figure 4D western analyses used in the revised manuscript. The full-length gels of the Figure 4E western analyses used in the revised manuscript.

| Gene          | cell lines | qRT-PCR     | RNA-seq |
|---------------|------------|-------------|---------|
| lnc-FAM133B-2 | CNE-2      | 1.00±0.302  | 1.00    |
|               | CNE-2R     | 15.21±0.621 | 6.15    |
|               | 6-10B      | 2.57±0.520  | —       |
|               | 6-10BR     | 7.25±0.911  | —       |
| miR-34a-5p    | CNE-2      | 5.25±0.612  | 9.60    |
|               | CNE-2R     | 1.00±0.767  | 1.00    |
|               | 6-10B      | 1.21±0.592  | —       |
|               | 6-10BR     | 0.54±1.211  | —       |
| CDK6          | CNE-2      | 1.00±1.254  | 3.70    |
|               | CNE-2R     | 19.21±1.578 | 23.93   |
|               | 6-10B      | 1.25±2.015  | —       |
|               | 6-10BR     | 7.55±2.205  | —       |

**Supplementary Figure 3. The expression data of lnc-FAM133B-2, miR-34a-5p and CDK6**
